# Supplementary material
Source: PubMed Central journal article supplement (PMC5204309)

SUPPLEMENTARY DATA

**Supplementary Table S1. Case-control studies investigating the association between mitochondrial oxidative capacity and insulin resistance/types 2 diabetes (T2DM) in humans**

| <b>Authors</b>                                         | <b>Size</b>                                                                                                                                                                                                  | <b>Covariates</b>                                      | <b>Diagnosis</b>                | <b>Mt capacity</b>                                | <b>Results</b>                                    |
|--------------------------------------------------------|--------------------------------------------------------------------------------------------------------------------------------------------------------------------------------------------------------------|--------------------------------------------------------|---------------------------------|---------------------------------------------------|---------------------------------------------------|
| <b>Petersen, <i>Science</i>, 2003</b>                  | 15 insulin-resistant elderly and 13 young controls                                                                                                                                                           | BMI and physical activity matched                      | Medical history and OGTT        | <sup>13</sup> C/ <sup>31</sup> P NMR spectroscopy | Reduced mitochondrial oxidative capacity          |
| <b>Schrauwen-Hinderling, <i>Diabetologia</i>, 2007</b> | 12 overweighted T2DM subjects and 9 controls                                                                                                                                                                 | BMI matched                                            | Medications                     | PCr recovery using MRS                            | Reduced mitochondrial oxidative capacity          |
| <b>Szendroedi, <i>Plos Med</i>, 2007</b>               | 10 patients with T2DM, 10 older controls; and 11 younger controls                                                                                                                                            | age-, sex- and body mass-matched (only older controls) | Medical history                 | ATP synthetic flux using MRS                      | Reduced mitochondrial oxidative capacity          |
| <b>Tranell, <i>Diabetes Care</i>, 2008</b>             | 10 well-controlled T2D subjects and 10 controls                                                                                                                                                              | Age, sex, weight and physical activity matched         | Medical history and medications | PCr recovery using MRS                            | No difference in mitochondrial oxidative capacity |
| <b>De Fayter, <i>Eur J Endocrinol.</i>, 2008</b>       | 10 long-standing, insulin-treated T2DM patients (diabetes group), 11 subjects with impaired fasting glucose, impaired glucose tolerance and/or recently diagnosed T2DM (pre-diabetes group), and 12 controls | Age, body mass and composition, physical activity      | Fasting glucose and OGTT        | PCr recovery using MRS                            | No difference in mitochondrial oxidative capacity |
| <b>Phielix, <i>Diabetes</i>, 2008</b>                  | 10 overweight diabetic patients, 12 first-degree                                                                                                                                                             | Age and BMI matched                                    | Medications                     | PCr recovery using MRS                            | Reduced mitochondrial oxidative capacity          |

SUPPLEMENTARY DATA

|                                                         |                                                                                                                              |                     |                                                                              |                        |                                                                                |
|---------------------------------------------------------|------------------------------------------------------------------------------------------------------------------------------|---------------------|------------------------------------------------------------------------------|------------------------|--------------------------------------------------------------------------------|
|                                                         | relatives, and 16 control subjects, all men                                                                                  |                     |                                                                              |                        |                                                                                |
| <b>Van Tienen, <i>J Clin Endocrinol Metab</i>, 2012</b> | 12 prediabetic, 11 longstanding T2DM male subjects and 12 male controls                                                      | Age and BMI matched | OGTT                                                                         | PCr recovery using MRS | No difference in mitochondrial oxidative capacity                              |
| <b>Tecilazich, <i>J Vasc Surg</i>, 2013</b>             | 11 T2DM patients without complication, 12 T2DM patients with neuropathy, 7 T2DM patients with neuropathy-PAD and 14 controls |                     | Medical history, physical examination, characterization of neuropathy , ABIs | PCr recovery using MRS | Reduced mitochondrial oxidative capacity only in T2DM patients with neuropathy |
| <b>Van der Weijer, <i>Plos One</i>, 2013</b>            | 30 obese sedentary male T2D patients and 31 obese sedentary male control subjects                                            |                     | Medications                                                                  | PCr recovery using MRS | Reduced mitochondrial oxidative capacity                                       |

Notes:

References:

De Feyter HM, van den Broek NM, Praet SF, Nicolay K, van Loon LJ, Prompers JJ. Early or advanced stage type 2 diabetes is not accompanied by in vivo skeletal muscle mitochondrial dysfunction. *Eur J Endocrinol*. 2008 May;158(5):643-53. doi: 10.1530/EJE-07-0756.

Petersen KF, Befroy D, Dufour S et al. Mitochondrial dysfunction in the elderly: possible role in insulin resistance. *Science*. 2003 May 16;300(5622):1140-2.

Phielix E, Schrauwen-Hinderling VB, Mensink M et al. Lower intrinsic ADP-stimulated mitochondrial respiration underlies in vivo mitochondrial dysfunction in muscle of male type 2 diabetic patients. *Diabetes*. 2008 Nov;57(11):2943-9. doi: 10.2337/db08-0391.

Schrauwen-Hinderling VB, Kooi ME, Hesselink MK et al. Impaired in vivo mitochondrial function but similar intramyocellular lipid content in patients with type 2 diabetes mellitus and BMI-matched control subjects. *Diabetologia*. 2007 Jan;50(1):113-20.

Szendroedi J, Schmid AI, Chmelik M et al. Muscle mitochondrial ATP synthesis and glucose transport/phosphorylation in type 2 diabetes. *PLoS Med*. 2007 May;4(5):e154.

Tecilazich F, Dinh T, Lyons TE et al. Postexercise phosphocreatine recovery, an index of mitochondrial

## SUPPLEMENTARY DATA

oxidative phosphorylation, is reduced in diabetic patients with lower extremity complications. *J Vasc Surg.* 2013 Apr;57(4):997-1005. doi: 10.1016/j.jvs.2012.10.011.

Trenell MI, Hollingsworth KG, Lim EL, Taylor R. Increased daily walking improves lipid oxidation without changes in mitochondrial function in type 2 diabetes. *Diabetes Care.* 2008 Aug;31(8):1644-9. doi: 10.2337/dc08-0303.

van de Weijer T, Sparks LM, Phielix E et al. Relationships between mitochondrial function and metabolic flexibility in type 2 diabetes mellitus. *PLoS One.* 2013;8(2):e51648. doi: 10.1371/journal.pone.0051648.

van Tienen FH, Praet SF, de Feyter HM et al. Physical activity is the key determinant of skeletal muscle mitochondrial function in type 2 diabetes. *J Clin Endocrinol Metab.* 2012 Sep;97(9):3261-9. doi: 10.1210/jc.2011-3454.

SUPPLEMENTARY DATA

**Supplementary Table S2. Spearman correlations exploring the relationship between  $\tau_{PCr}$  (sec) and prediabetes, HOMA index, Matsuda Index and Reduced Matsuda index:**

|                       | $\tau_{PCr}$ (sec)                                     |         |                               |         |                                |         |                                |         |
|-----------------------|--------------------------------------------------------|---------|-------------------------------|---------|--------------------------------|---------|--------------------------------|---------|
|                       | Model I (age, sex and %PCr depletion adjusted) (N=248) |         | Model II <sup>¶</sup> (N=248) |         | Model III <sup>§</sup> (N=248) |         |                                |         |
|                       | R                                                      | P value | R                             | P value | R                              | P value |                                |         |
| Prediabetes           | 0.26                                                   | <.001   | 0.21                          | .001    | 0.22                           | <.001   |                                |         |
| HOMA index            | 0.19                                                   | .002    | 0.16                          | .014    | 0.17                           | .009    |                                |         |
| Matsuda index         | -0.22                                                  | <.001   | -0.16                         | .012    | -0.17                          | .009    |                                |         |
| Reduced Matsuda index | -0.27                                                  | <.001   | -0.20                         | .002    | -0.21                          | .001    |                                |         |
|                       | Model IV <sup>∞</sup> (N=247)                          |         | Model V <sup>#</sup> (N=248)  |         | Model VI <sup>□</sup> (N=248)  |         | Model VII <sup>Ⓜ</sup> (N=248) |         |
|                       | R                                                      | P value | R                             | P value | R                              | P value | R                              | P value |
| Prediabetes           | 0.25                                                   | <.001   | 0.22                          | <.001   | 0.22                           | <.001   | 0.23                           | <.001   |
| HOMA index            | 0.21                                                   | <.001   | 0.17                          | .010    | 0.16                           | .013    | 0.19                           | .003    |
| Matsuda index         | -0.22                                                  | <.001   | -0.17                         | .011    | -0.17                          | .009    | -0.20                          | .002    |
| Reduced Matsuda index | -0.26                                                  | <.001   | -0.19                         | .002    | -0.21                          | .001    | -0.24                          | <.001   |

<sup>¶</sup> age, sex and %PCr depletion, race, education, smoking status, physical activity level, body weight, body height, DEXA-measured trunk fat mass.

<sup>§</sup> age, sex and %PCr depletion, race, education, smoking status, physical activity level, body weight, body height, DEXA-measured trunk fat mass, plasma levels of IL6, CRP, leptin and adiponectin

<sup>∞</sup> age, sex and %PCr depletion, race, education, smoking status, physical activity level, body height, body weight, waist circumference, plasma levels of IL6, CRP, leptin and adiponectin

<sup>#</sup> age, sex and %PCr depletion, race, education, smoking status, physical activity level, body weight, body height, DEXA-measured total body fat mass, plasma levels of IL6, CRP, leptin and adiponectin

<sup>□</sup> age, sex and %PCr depletion, race, education, smoking status, physical activity level, body height,

## SUPPLEMENTARY DATA

percentage of body fatness, plasma levels of IL6, CRP, leptin and adiponectin

<sup>Ж</sup> age, sex and %PCr depletion, race, education, smoking status, physical activity level, BMI, plasma levels of IL6, CRP, leptin and adiponectin

SUPPLEMENTARY DATA

**Supplementary Table S3. Results from multivariate logistic models testing the association between tertiles of  $\tau_{PCr}$  (sec) and likelihood (OR) of having prediabetes or being in a higher tertile of HOMA Index, Matsuda Index and Reduced Matsuda Index:**

| Likelihood of prediabetes                             |                                                           |         |                       |         |                        |         |                        |         |
|-------------------------------------------------------|-----------------------------------------------------------|---------|-----------------------|---------|------------------------|---------|------------------------|---------|
|                                                       | Model I (age, sex and %PCr depletion adjusted)<br>(N=248) |         | Model II ¥<br>(N=248) |         | Model III §<br>(N=248) |         |                        |         |
| Tertiles of $\tau_{PCr}$                              | OR (95%CI)                                                | P value | OR (95%CI)            | P value | OR (95%CI)             | P value |                        |         |
| Second Vs First                                       | 4.21 (2.07-8.57)                                          | <.001   | 3.57 (1.62-7.86)      | .002    | 3.44 (1.54-7.68)       | .003    |                        |         |
| Third vs First                                        | 4.67 (2.19-9.96)                                          | <.001   | 5.04 (2.13-11.91)     | <.001   | 5.11 (2.14-12.18)      | <.001   |                        |         |
|                                                       | Model IV ∞<br>(N=247)                                     |         | Model V #<br>(N=248)  |         | Model VI □<br>(N=248)  |         | Model VII Ⓜ<br>(N=248) |         |
| Tertiles of $\tau_{PCr}$                              | OR (95%CI)                                                | P value | OR (95%CI)            | P value | OR (95%CI)             | P value | OR (95%CI)             | P value |
| Second Vs First                                       | 4.17 (1.94-8.96)                                          | <.001   | 3.59 (1.64-7.84)      | .001    | 3.58 (1.66-7.73)       | .001    | 4.39 (2.07-9.30)       | <.001   |
| Third vs First                                        | 5.84 (2.51-13.62)                                         | <.001   | 4.63 (1.98-10.83)     | <.001   | 4.51 (1.95-10.44)      | <.001   | 5.28 (2.32-12.03)      | <.001   |
| Higher Tertile of HOMA Index (Insulin Resistance)     |                                                           |         |                       |         |                        |         |                        |         |
|                                                       | Model I (age, sex and %PCr depletion adjusted)<br>(N=248) |         | Model II ¥<br>(N=248) |         | Model III §<br>(N=248) |         |                        |         |
| Tertiles of $\tau_{PCr}$                              | OR (95%CI)                                                | P value | OR (95%CI)            | P value | OR (95%CI)             | P value |                        |         |
| Second Vs First                                       | 1.47 (0.82-2.63)                                          | .194    | 1.09 (0.57-2.11)      | .777    | 1.07 (0.55-2.09)       | .829    |                        |         |
| Third vs First                                        | 2.94 (1.58-5.45)                                          | <.001   | 2.95 (1.45-5.98)      | .003    | 2.84 (1.39-5.80)       | .004    |                        |         |
|                                                       | Model IV ∞<br>(N=247)                                     |         | Model V #<br>(N=248)  |         | Model VI □<br>(N=248)  |         | Model VII Ⓜ<br>(N=248) |         |
| Tertiles of $\tau_{PCr}$                              | OR (95%CI)                                                | P value | OR (95%CI)            | P value | OR (95%CI)             | P value | OR (95%CI)             | P value |
| Second Vs First                                       | 1.26 (0.66-2.44)                                          | .481    | 1.84 (0.61-2.28)      | .614    | 1.03 (0.54-1.96)       | .926    | 1.36 (0.72-2.57)       | .347    |
| Third vs First                                        | 3.46 (1.69-7.09)                                          | <.001   | 2.79 (1.37-5.73)      | .005    | 2.30 (1.16-4.59)       | .018    | 3.16 (1.56-6.38)       | .001    |
| Higher Tertile of Matsuda Index (Insulin Sensitivity) |                                                           |         |                       |         |                        |         |                        |         |
|                                                       | Model I (age, sex and %PCr                                |         | Model II ¥            |         | Model III §            |         |                        |         |

SUPPLEMENTARY DATA

|                                                              | depletion adjusted)<br>(N=248)                            |         | (N=248)                          |         | (N=248)                           |         |                                   |         |
|--------------------------------------------------------------|-----------------------------------------------------------|---------|----------------------------------|---------|-----------------------------------|---------|-----------------------------------|---------|
| Tertiles of<br>τ <sub>PCr</sub>                              | OR (95%CI)                                                | P value | OR (95%CI)                       | P value | OR (95%CI)                        | P value | OR (95%CI)                        | P value |
| Second Vs First                                              | 0.50 (0.28-0.90)                                          | .021    | 0.59 (0.31-1.12)                 | .106    | 0.56 (0.29-1.09)                  | .087    |                                   |         |
| Third vs First                                               | 0.32 (0.17-0.59)                                          | <.001   | 0.33 (0.16-0.66)                 | .002    | 0.31 (0.15-0.63)                  | .001    |                                   |         |
|                                                              | Model IV <sup>∞</sup><br>(N=247)                          |         | Model V <sup>#</sup><br>(N=248)  |         | Model VI <sup>□</sup><br>(N=248)  |         | Model VII <sup>Ⓜ</sup><br>(N=248) |         |
| Tertiles of<br>τ <sub>PCr</sub>                              | OR (95%CI)                                                | P value | OR (95%CI)                       | P value | OR (95%CI)                        | P value | OR (95%CI)                        | P value |
| Second Vs First                                              | 0.49 (0.25-0.95)                                          | .034    | 0.53 (0.28-1.02)                 | .059    | 0.62 (0.33-1.18)                  | .148    | 0.5 (0.27-0.95)                   | .035    |
| Third vs First                                               | 0.24 (0.12-0.50)                                          | <.001   | 0.31 (0.15-0.63)                 | .001    | 0.38 (0.19-0.76)                  | .006    | 0.28 (0.14-0.57)                  | <.001   |
| Higher Tertile of Reduced Matsuda Index(Insulin Sensitivity) |                                                           |         |                                  |         |                                   |         |                                   |         |
|                                                              | Model I (age, sex and %PCr depletion adjusted)<br>(N=248) |         | Model II <sup>¥</sup><br>(N=248) |         | Model III <sup>§</sup><br>(N=248) |         |                                   |         |
| Tertiles of<br>τ <sub>PCr</sub>                              | OR (95%CI)                                                | P value | OR (95%CI)                       | P value | OR (95%CI)                        | P value | OR (95%CI)                        | P value |
| Second Vs First                                              | 0.38 (0.21-0.69)                                          | .001    | 0.46 (0.24-0.88)                 | .018    | 0.45 (0.24-0.87)                  | .018    |                                   |         |
| Third vs First                                               | 0.28 (0.15-0.53)                                          | <.001   | 0.32 (0.16-0.63)                 | .001    | 0.31 (0.16-0.63)                  | .001    |                                   |         |
|                                                              | Model IV <sup>∞</sup><br>(N=247)                          |         | Model V <sup>#</sup><br>(N=248)  |         | Model VI <sup>□</sup><br>(N=248)  |         | Model VII <sup>Ⓜ</sup><br>(N=248) |         |
| Tertiles of<br>τ <sub>PCr</sub>                              | OR (95%CI)                                                | P value | OR (95%CI)                       | P value | OR (95%CI)                        | P value | OR (95%CI)                        | P value |
| Second Vs First                                              | 0.38 (0.19-0.73)                                          | .004    | 0.44 (0.23-0.83)                 | .012    | 0.49 (0.26-0.92)                  | .027    | 0.41 (0.22-0.76)                  | .005    |
| Third vs First                                               | 0.25 (0.12-0.49)                                          | <.001   | 0.32 (0.16-0.64)                 | .003    | 0.36 (0.18-0.72)                  | .004    | 0.29 (0.14-0.57)                  | <.001   |

¥ age, sex and %PCr depletion, race, education, smoking status, physical activity level, body weight, body height, DEXA-measured trunk fat mass.

§ age, sex and %PCr depletion, race, education, smoking status, physical activity level, body weight, body height, DEXA-measured trunk fat mass, plasma levels of IL6, CRP, leptin and adiponectin

∞ age, sex and %PCr depletion, race, education, smoking status, physical activity level, body height, body weight, waist circumference, plasma levels of IL6, CRP, leptin and adiponectin

## SUPPLEMENTARY DATA

# age, sex and %PCr depletion, race, education, smoking status, physical activity level, body weight, body height, DEXA-measured total body fat mass, plasma levels of IL6, CRP, leptin and adiponectin

□ age, sex and %PCr depletion, race, education, smoking status, physical activity level, body height, percentage of body fatness, plasma levels of IL6, CRP, leptin and adiponectin

⋈ age, sex and %PCr depletion, race, education, smoking status, physical activity level, BMI, plasma levels of IL6, CRP, leptin and adiponectin



SUPPLEMENTARY DATA

**Supplementary Table S4. Akaike Information Criterion (AIC) for linear, quadratic and cubic spline models testing the relationship between  $\tau$  PCr and HOMA\_IR/Matsuda Index/ Reduced Matsuda Index**

|                           | <b>HOMA_IR</b> | <b>Matsuda Index</b> | <b>Reduced Matsuda Index</b> |
|---------------------------|----------------|----------------------|------------------------------|
|                           | AIC            | AIC                  | AIC                          |
| <b>Linear model</b>       | 1894.014       | 1888.414             | 1881.302                     |
| <b>Quadratic model</b>    | 1895.991       | 1890.221             | 1881.582                     |
| <b>Cubic spline model</b> | 1892.062       | 1892.220             | 1883.037                     |

SUPPLEMENTARY DATA

**Supplementary Table S5. Spearman correlations exploring the relationship between  $\tau_{PCr}$  (sec) and hepatic insulin resistance/muscle insulin sensitivity indices:**

| $\tau_{PCr}$ (sec)                         |                         |         |                                                    |         |                                                                                                     |         |                                                                                                                                             |         |                              |         |
|--------------------------------------------|-------------------------|---------|----------------------------------------------------|---------|-----------------------------------------------------------------------------------------------------|---------|---------------------------------------------------------------------------------------------------------------------------------------------|---------|------------------------------|---------|
|                                            | Un-adjusted correlation |         | Age, sex and %PCr depletion adjusted - correlation |         | Age, sex and %PCr depletion, race, education, weight, height, smoking status adjusted - correlation |         | Age, sex and %PCr depletion, race, education, weight, height, smoking status trunk fat mass, physical activity level adjusted – correlation |         | Fully*- adjusted correlation |         |
|                                            | R                       | P value | R                                                  | P value | R                                                                                                   | P value | R                                                                                                                                           | P value | R                            | P value |
| <b>Hepatic insulin resistance</b>          | 0.06                    | .362    | 0.09                                               | .151    | 0.08                                                                                                | .218    | 0.05                                                                                                                                        | .467    | 0.03                         | .639    |
| <b>Skeletal muscle insulin sensitivity</b> | -0.19                   | .003    | -0.19                                              | .004    | -0.15                                                                                               | .021    | -0.09                                                                                                                                       | .159    | -0.07                        | .288    |

\*age, sex and %PCr depletion, race, education, smoking status, physical activity level, body weight, body height, DEXA-measured trunk fat mass, plasma levels of IL6, CRP, leptin and adiponectin

SUPPLEMENTARY DATA

**Supplementary Figure S1. Crude plots exploring the relationship between  $\tau$  PCr and HOMA\_IR/Matsuda Index/ (reduced-) Matsuda Index (red line=linear regression line; blue line=lowess line).**

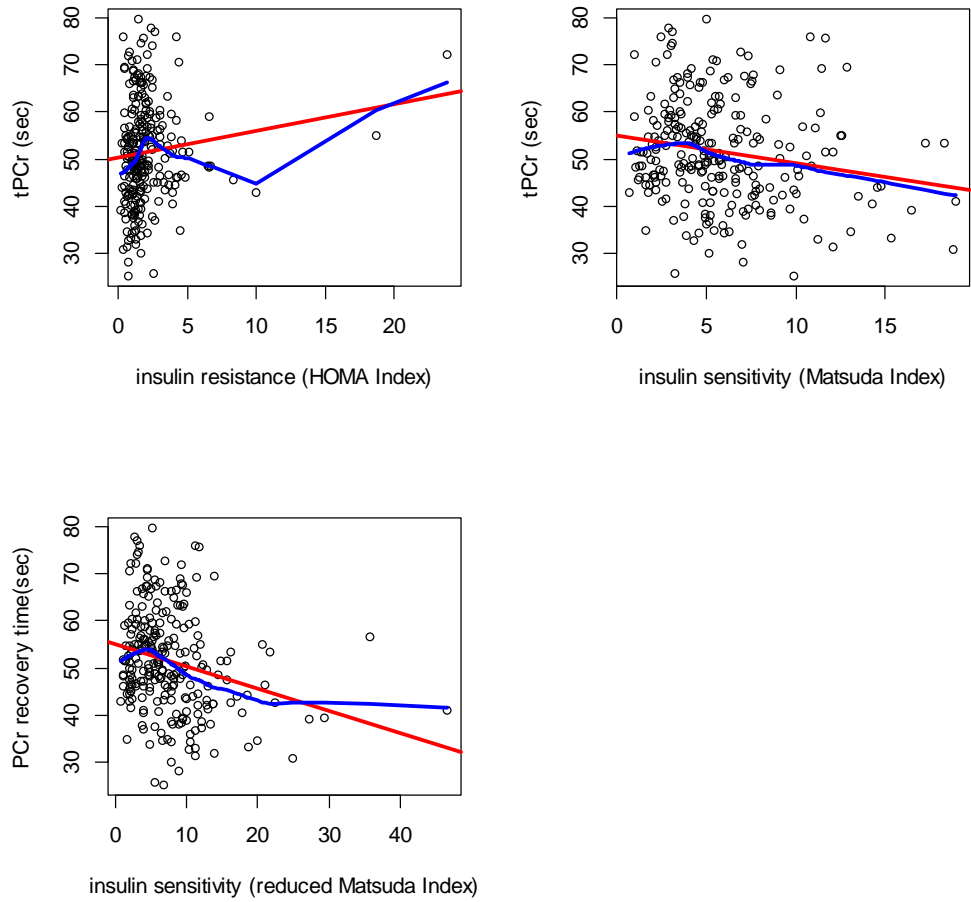

Supplement: DB160754SupplementaryData.pdf [file DB160754SupplementaryData.pdf]
